# Supplementary material
Source: Springer Nature journal article supplement (https://www.springermedizin.de/resource/supplementary/12946_2011_144_MOESM1_ESM.pdf/9555258)
Supplement: MOESM1 [file 9555258]

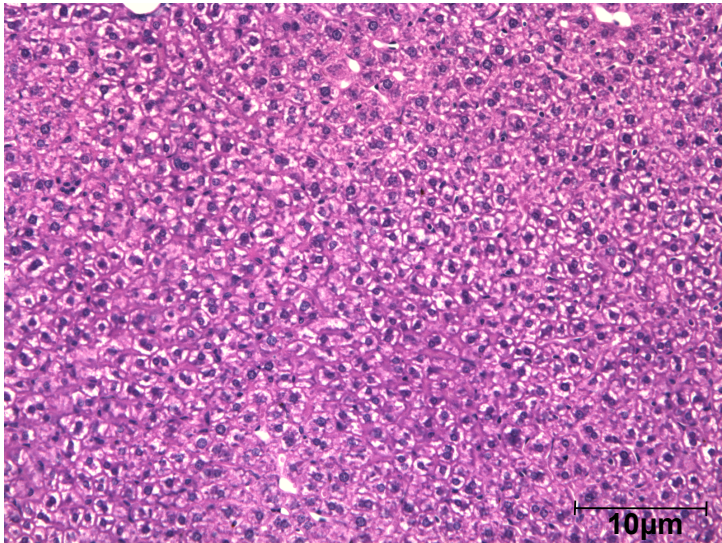

**C57BKS Female**

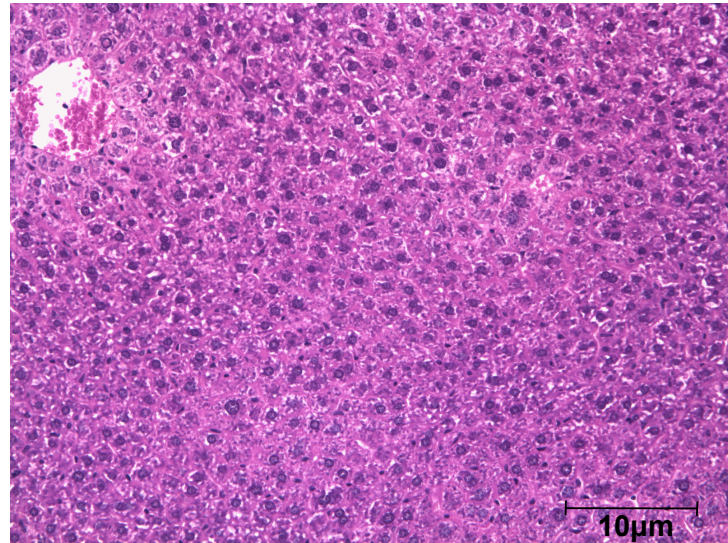

**C57BKS Male**

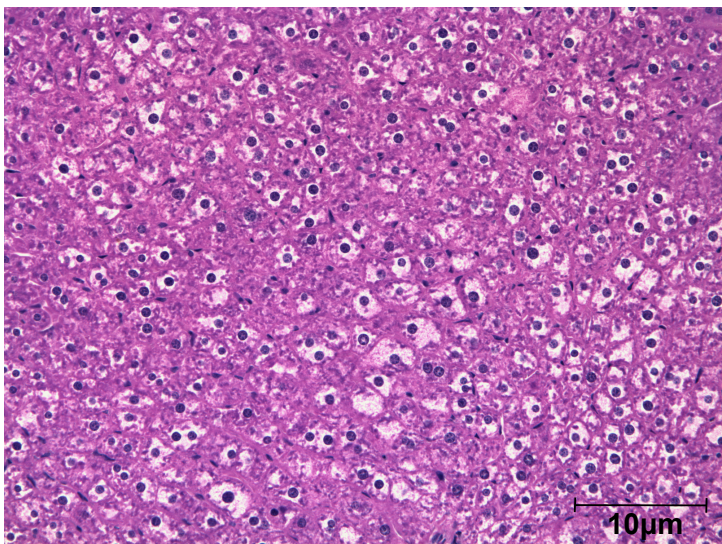

**Db/db Female**

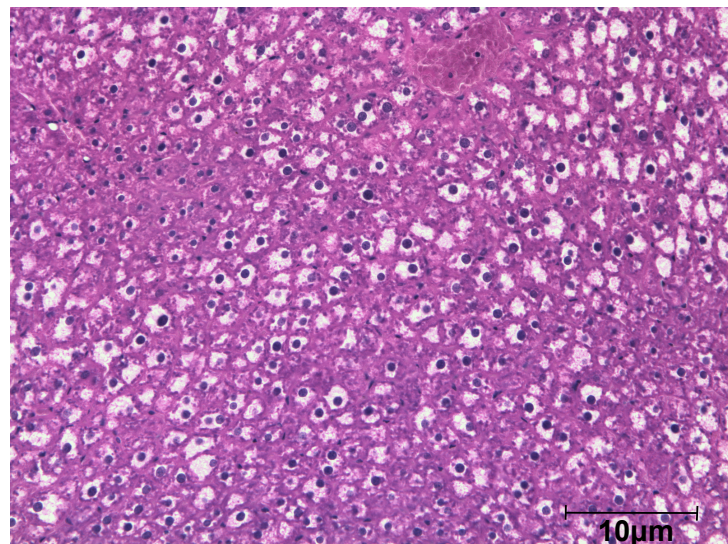

**Db/db Male**
